# Supplementary material
Source: publisher site journal article supplement (https://cdn.jamanetwork.com/ama/content_public/journal/jamanetworkopen/938577/zoi200851supp2_prod_1605020862.72395.pdf)
Supplement: Supplementary file [file zoi200851supp2_prod_1605020862.72395.pdf]

## Data Sharing Statement

Dykes. Evaluation of a Patient-Centered Fall-Prevention Tool Kit to Reduce Falls and Injuries. *JAMA Netw Open*. Published November 17, 2020. 10.1001/jamanetworkopen.2020.25889

### Data

**Data available:** No

### Additional Information

**Explanation for why data not available:** Data sharing is not available. The study protocol and statistical analysis plans are available upon request.
